# Supplementary material for: Tunneled Peritoneal Catheter for Refractory Ascites in Cirrhosis: A Randomized Case-Series
Source: Preprints.org preprint supplement (doi:10.20944/preprints202010.0039.v1), 2020-10-02
Supplement: Supplementary file 3 [file Suppl file PETRA Data anonymous.xlsx]

## Sheet: Ark1
No	Age	Etiology	Child	Meld-na	Meld	Albumin	Sodium	Creatinine	INR	Bilirubin	Spiron	Furix	Prior_LVP_days	Follow_up_days	CAS_0	CAS_1	CAS_2	CAS_3	CAS_4	CAS_5	CAS_6	Alb_0	Alb_1	Alb_2	Alb_3	Alb_4	Alb_5	Alb_6	Na_0	Na_1	Na_2	Na_3	Na_4	Na_5	Na_6	Crea_0	Crea_1	Crea_2	Crea_3	Crea_4	Crea_5	Crea_6	Days_to_first_LVP	No_LVP_during_FU	Av_time_LVP	Albumin_doses	Albumin_g	no_pos_asc_cultures	asc_bact
LVP
3	61	Alco	9	18	16	31	135	116	1.5	34	0	160	5	130	21	26	26	17				33	30	31	30				141	133	130	125				110	111	99	106				14	9	14	15	300	1	klebsiella pneumoniae
4	48	Alco	12	33	28	21	122	130	2	249	200	80	14	45	22							21							122							130							14	3	15	4	80
6	69	Hep B	9	17	17	30	135	73	1.5	51	0	40	7	181	25	14	21	14	6	12	9	30		24	28		31	29	135		130	133	133	133		73		59	67		62	68	6	14	13	19	380
8	75	Alco	10	18	17	23	136	116	1.5	41	0	80	7	197	11	10	11	3	6	9	16	23	30			29	27	25	136	138			137	133	133	116	121			114	113	110	20	15	13	30	600
10	73	NASH	8	11	11	28	146	126	1.1	7	0	0	8	188	17	17	20	16	16	12	15	28	28	25	26	31	27	27	146	144	141	142	142	143	142	126	127	110	111	129	148	147	7	17	11	25	500
12	62	Alco	9	23	13	27	126	76	1.6	27	50	40	5	174	24	18	17	21	19	26		27	29	26	29	27	23		126	124	121	117	121	120		76	77	78	70	73	74		8	22	8	35	700
13	68	Alco	10	18	18	24	145	133	1.6	35	0	0	14	182	9	5	5	10	7	9	4	24	29	30	30	28	30	30	145	142	145	142	138	139	144	133	150	147	133	138	166	139	6	11	16	26	520
Median	68		9	18	17	27	135	116	1.5	35	0	40	7	181																															13	25
Range														45-197
PleurX																																													Av_time_drainage
1	77	NASH	8	11	11	30	137	54	1.4	25	0	160	7	198	19	18	25	26	33	36	24	30	26	25	23	21	24	23	137	131	134	132	128	136	136	54	62	59	64	74	77	69	na	0	4	2	40	4	Staph Epidermidis
2	77	ASH/NASH	9	11	11	23	124	81	1.4	24	50	0	7	39	2	6						23							124							81							na	0	5	1	40	2	Staph Epidermidis
5	73	Alco	8	7	7	31	133	66	1.1	16	0	160	8	198	20	12	23		12	9	13	31	26	29		26	27	28	133	130	135		136	138	136	66	85	61		65	69	58	na	0	2	3	40	3	Staph Epidermidis x 3; Staph Hominis x 2
7	64	Alco	9	8	8	23	127	64	1.2	16	300	160	10	208	11	8	10	6	4		10	23	21		15	15			127	126		123	130			64	62		64	70			na	0	3	5	60	7	Enterococcus faecalis x 7; Bacillus Cereus x 6; Salmonella Dublin x 3; Acitenobacter Radioresistens x 1
9	57	Alco	10	25	17	32	126	72	1.8	49	200	80	12	56	21	17	10					28	23	22					125	115	117					87	111	87					56	1	2	5	80	3	Staph epidermidis x3, Bacillus Cereus x 3
11	64	Alco	10										7	12																													na	0	3	3
Median	68.5		9	11	11	30	127	66	1.4	24	50	160	7.5	127																															3		40
Range																																													43953
[truncated: 2 more columns]
